# Supplementary figures and images for: Site-Specific Microbial Decomposer Communities Do Not Imply Faster Decomposition: Results from a Litter Transplantation Experiment
Source: MDPI journal article supplement (doi:10.3390/microorganisms7090349), 2019-09-12

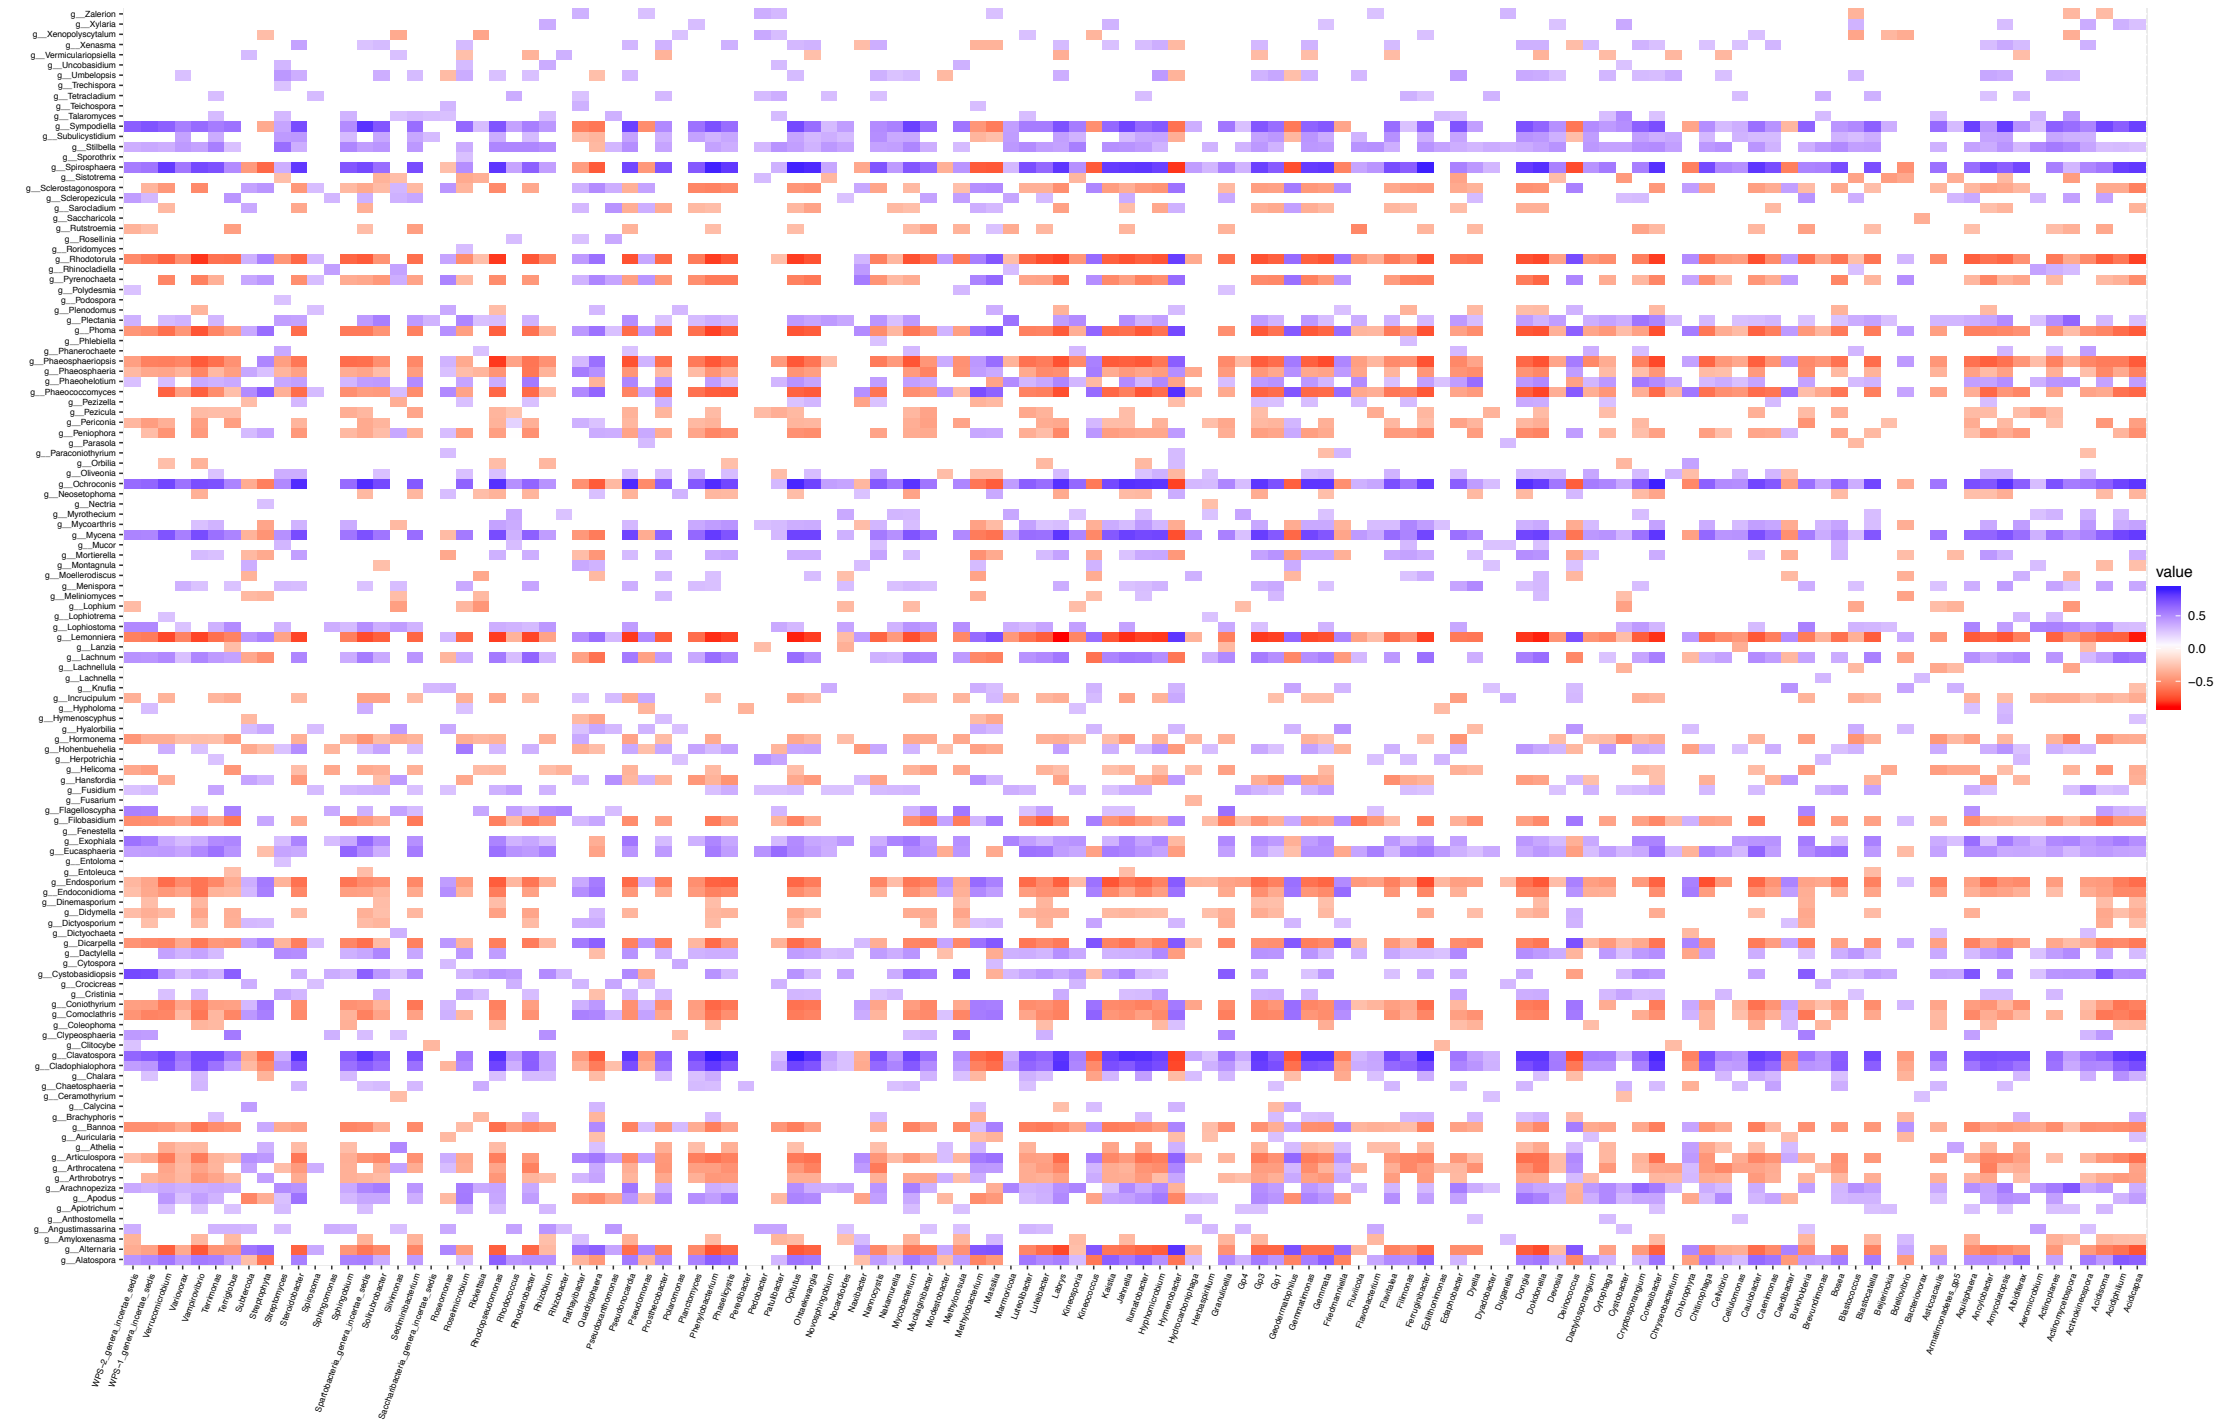

Supplement: s1 [file s1]

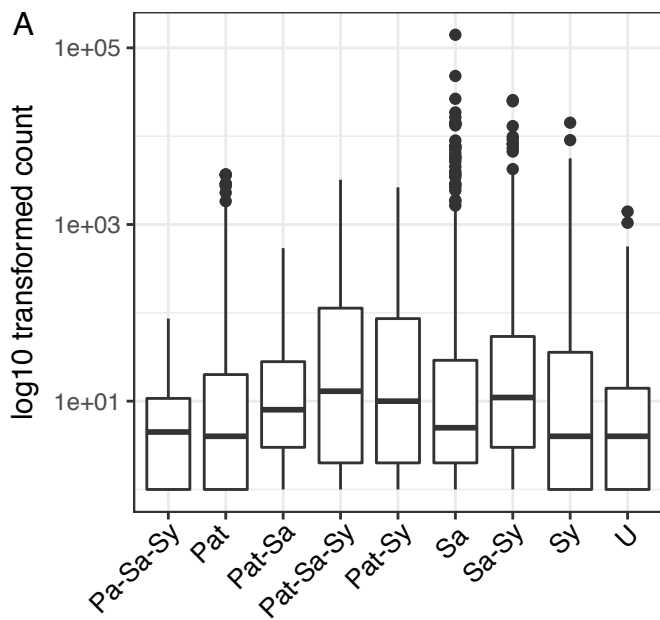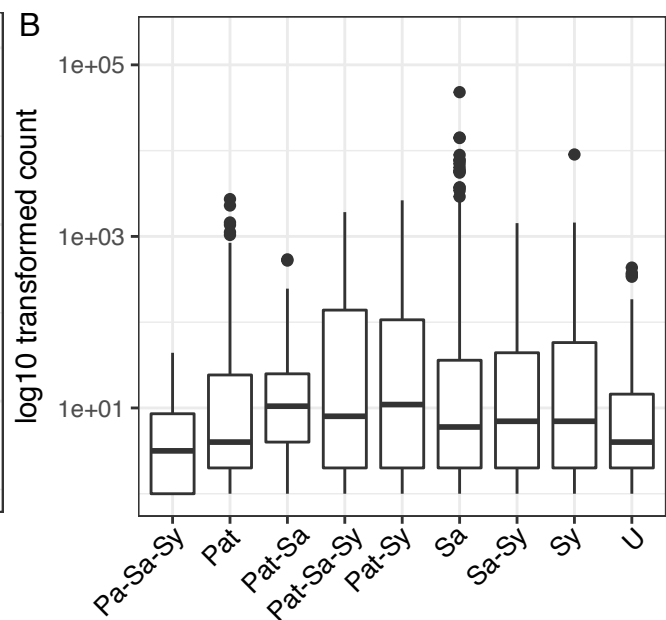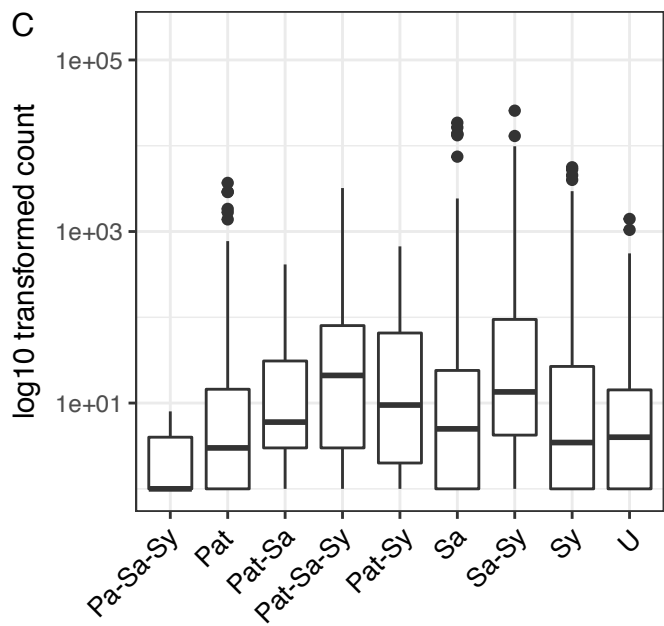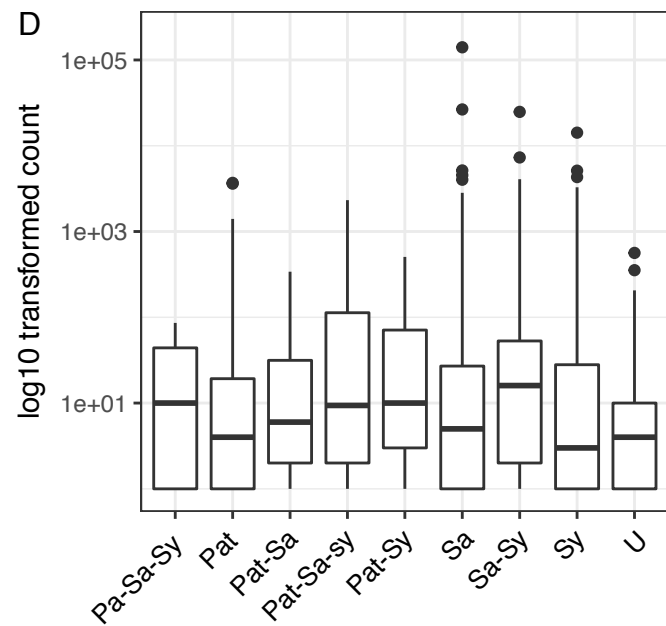

Supplement: s1 [file s1]

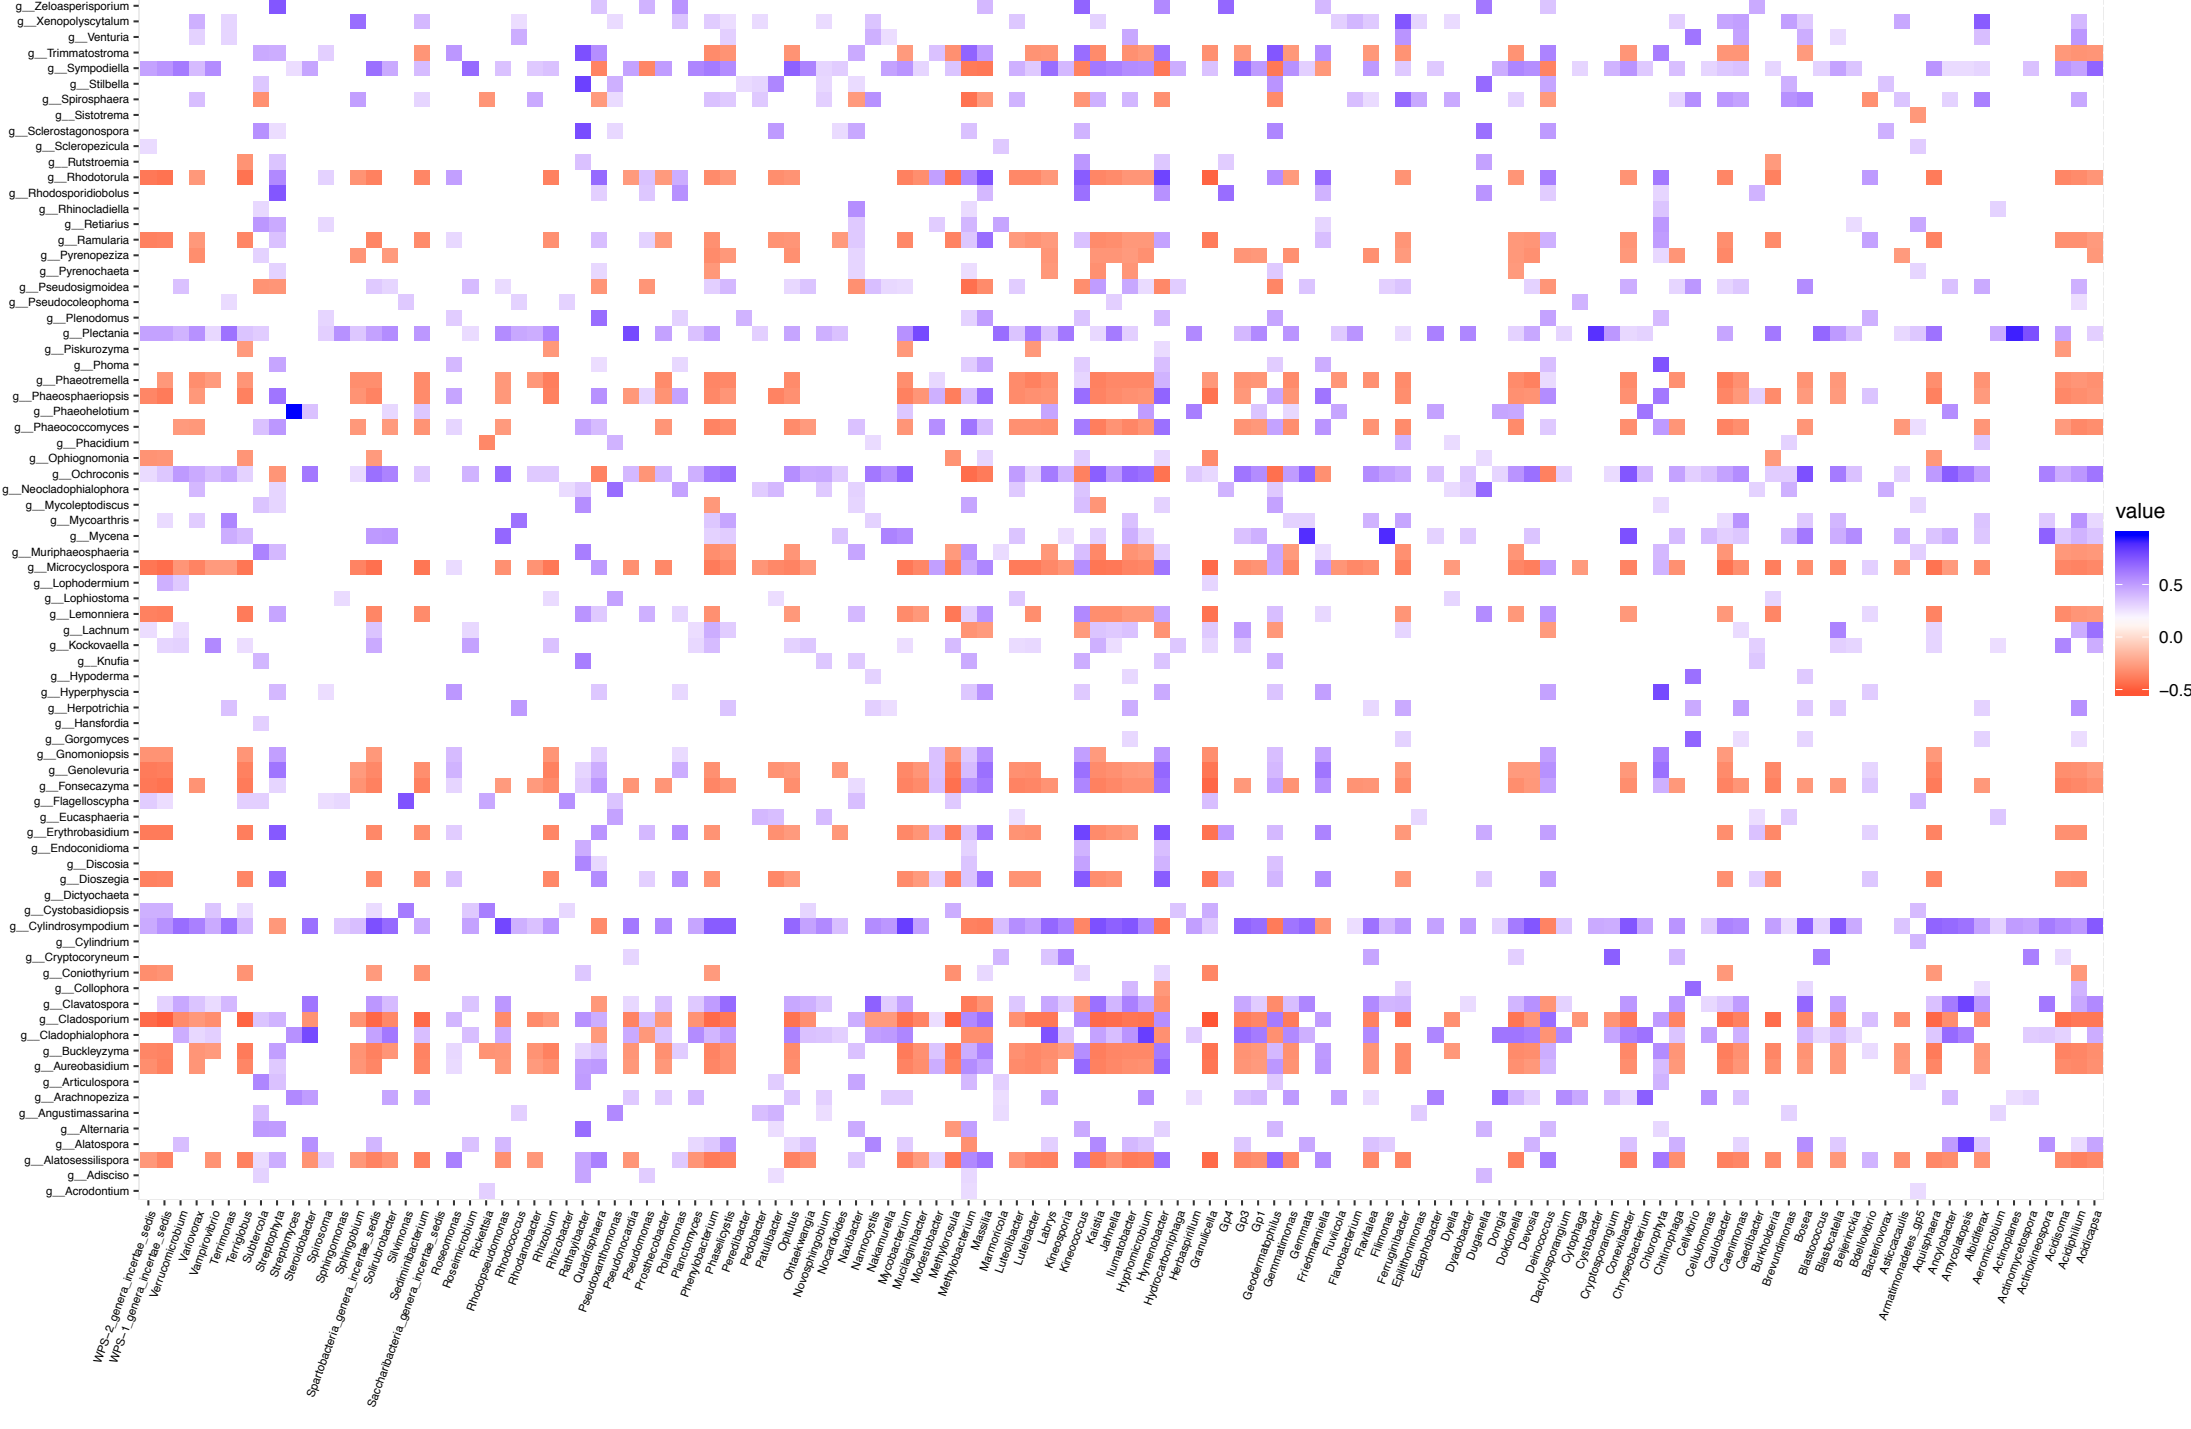

Supplement: s1 [file s1]

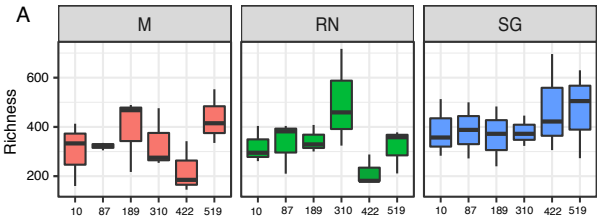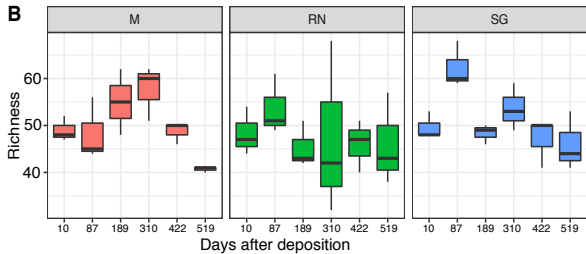

Supplement: s1 [file s1]

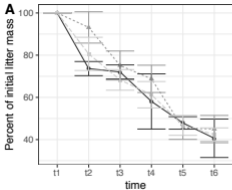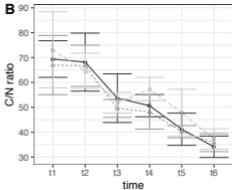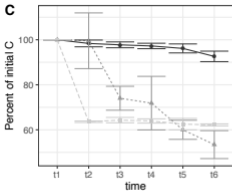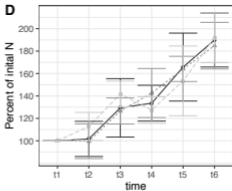

Days after deposition

Supplement: s1 [file s1]

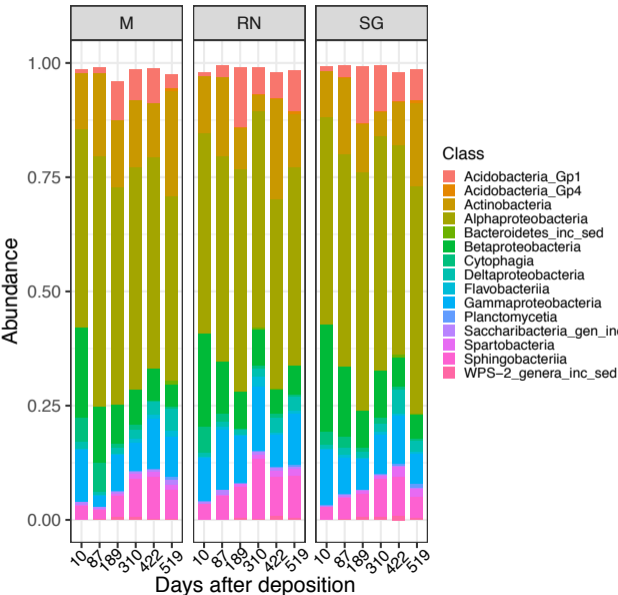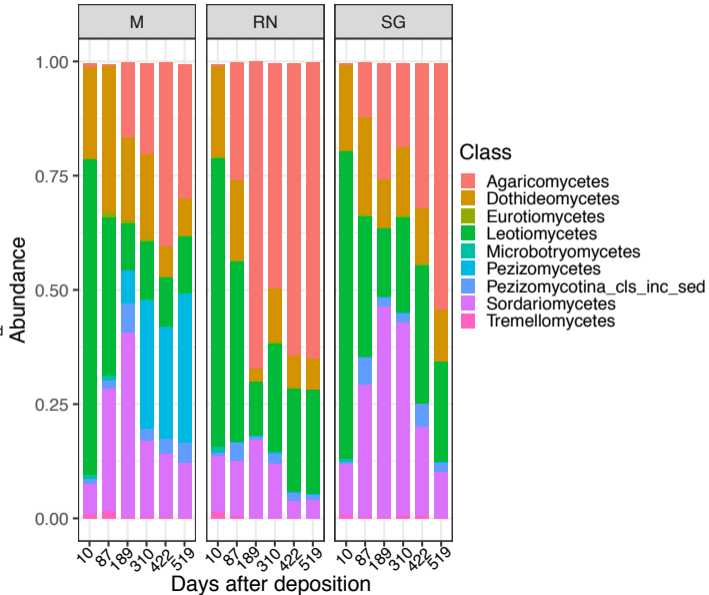

Supplement: s1 [file s1]

**A**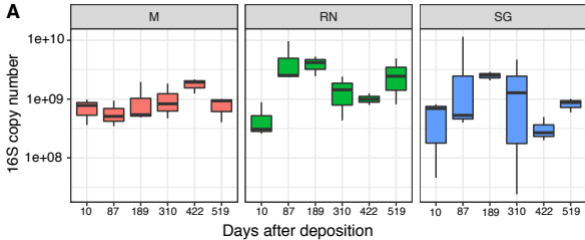**B**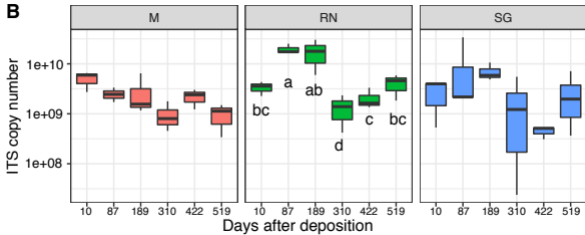

Supplement: s1 [file s1]
